# Supplementary material for: Causal complexity of environmental pollution in China: A province-level fuzzy-set qualitative comparative analysis
Source: Research Square preprint supplement (doi:10.21203/rs.3.rs-1529869/v1), 2022-04-27
Supplement: Supplementary file 1 [file dd740f043b06c5c84f2b6b5d.docx]

Appendix

Table A. Abbreviations of regions.

|  | Region |  | Region |  | Region |
| --- | --- | --- | --- | --- | --- |
| R1 | Beijing | R11 | Zhejiang | R21 | Hainan |
| R2 | Tianjin | R12 | Anhui | R22 | Chongqing |
| R3 | Hebei | R13 | Fujian | R23 | Sichuan |
| R4 | Shanxi | R14 | Jiangxi | R24 | Guizhou |
| R5 | Inner Mongolia | R15 | Shandong | R25 | Yunnan |
| R6 | Liaoning | R16 | Henan | R26 | Shaanxi |
| R7 | Jilin | R17 | Hubei | R27 | Gansu |
| R8 | Heilongjiang | R18 | Hunan | R28 | Qinghai |
| R9 | Shanghai | R19 | Guangdong | R29 | Ningxia |
| R10 | Jiangsu | R20 | Guangxi | R30 | Xinjiang |
